# Supplementary material
Source: PubMed Central journal article supplement (PMC4038408)
Supplement: NIHMS582335-supplement-1.pdf [file NIHMS582335-supplement-1.pdf]

Supplementary Table 1

| <b>Patient #</b> | <b>Age</b> | <b>Pathological Diagnosis</b> | <b>Differentiation</b>    |
|------------------|------------|-------------------------------|---------------------------|
| 1                | 48 M       | Adenocarcinoma                | Unknown                   |
| 2                | 57 M       | Adenocarcinoma                | Unknown                   |
| 3                | 68F        | Adenocarcinoma                | Unknown                   |
| 4                | 68 M       | Adenocarcinoma                | Moderately Differentiated |
| 5                | 70 M       | Adenocarcinoma                | Mod/Poorly Differentiated |
| 6                | 52 F       | Adenocarcinoma                | Mod/Well Differentiated   |
| 7                | 70 M       | Adenocarcinoma                | Mod/Poorly Differentiated |
| 8                | 67 M       | Adenocarcinoma                | Mod/Poorly Differentiated |
