# Supplementary material
Source: PubMed Central journal article supplement (PMC4038408)
Supplement: NIHMS582335-supplement-3.pdf [file NIHMS582335-supplement-3.pdf]

A.

Anti-ST6Gal-I

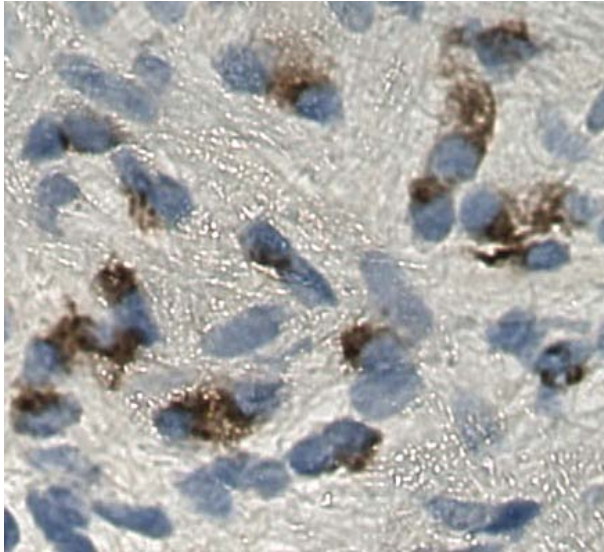

Isotype control IgG

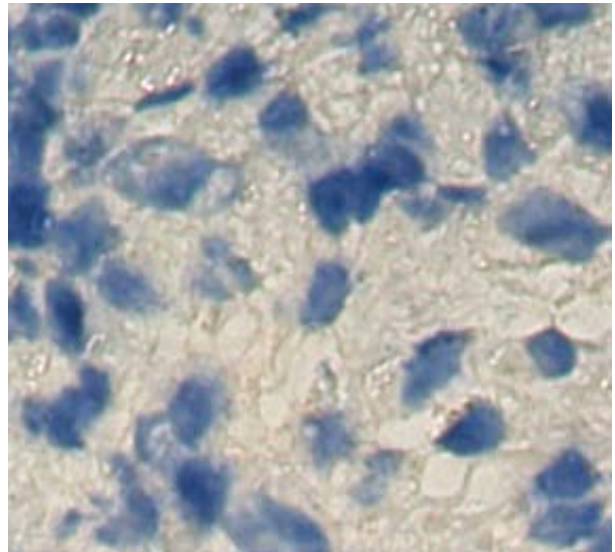

Hepatic metastatic tumor

B.

No Primary Antibody

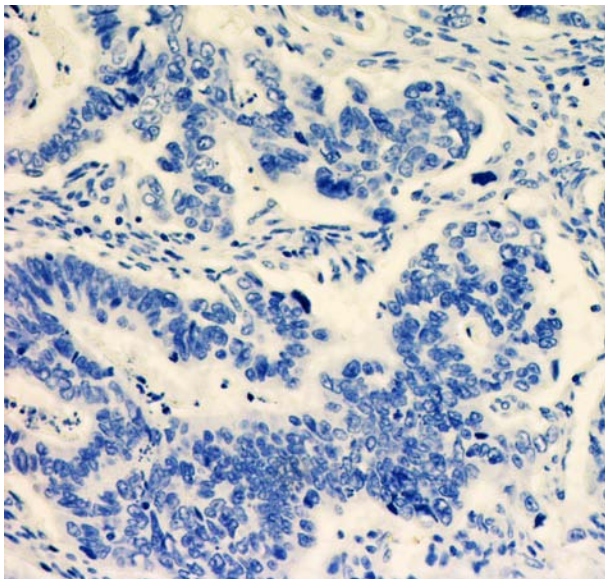

Colon Tumor

No Primary Antibody

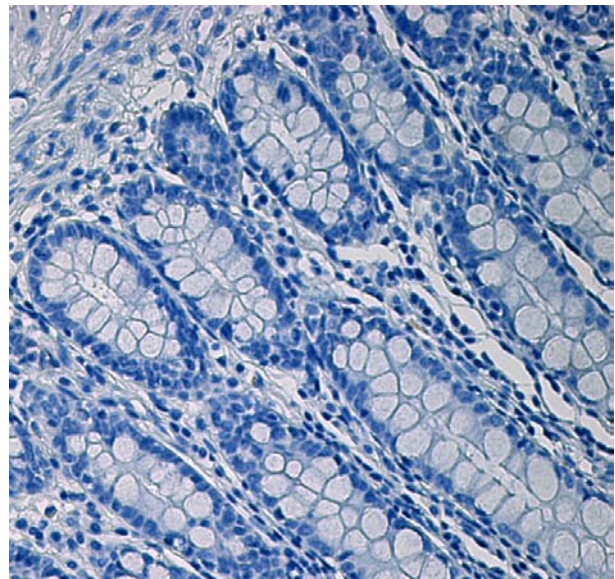

Normal Colon
