# Supplementary material
Source: PubMed Central journal article supplement (PMC4038408)

Supplementary Figure 1

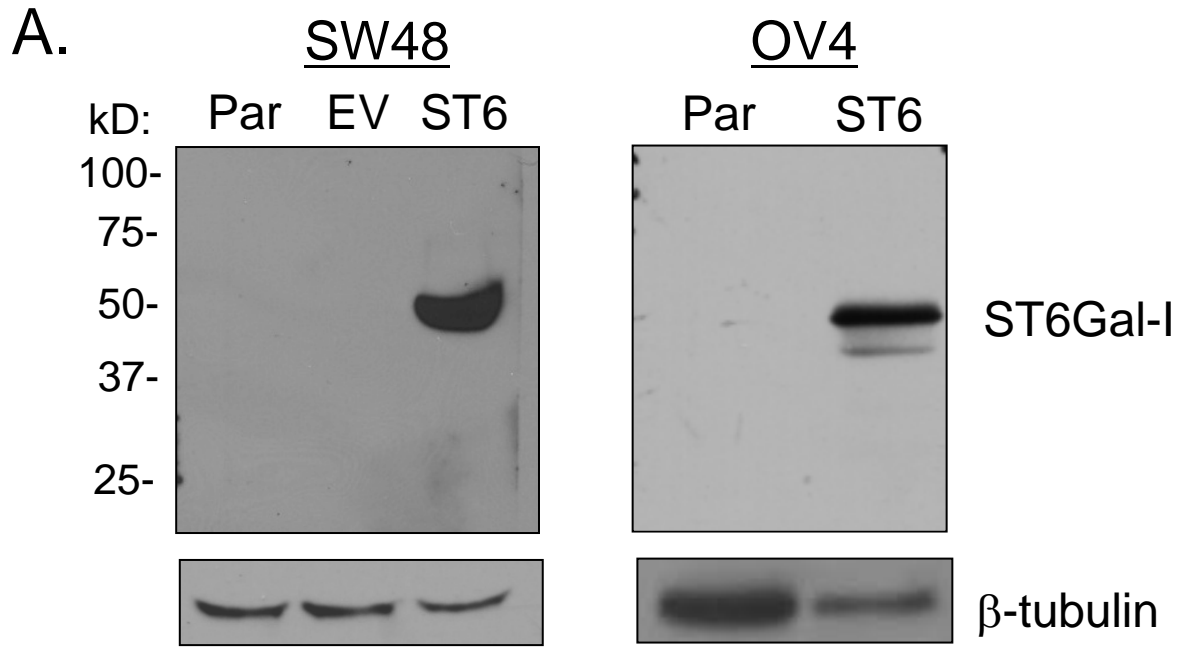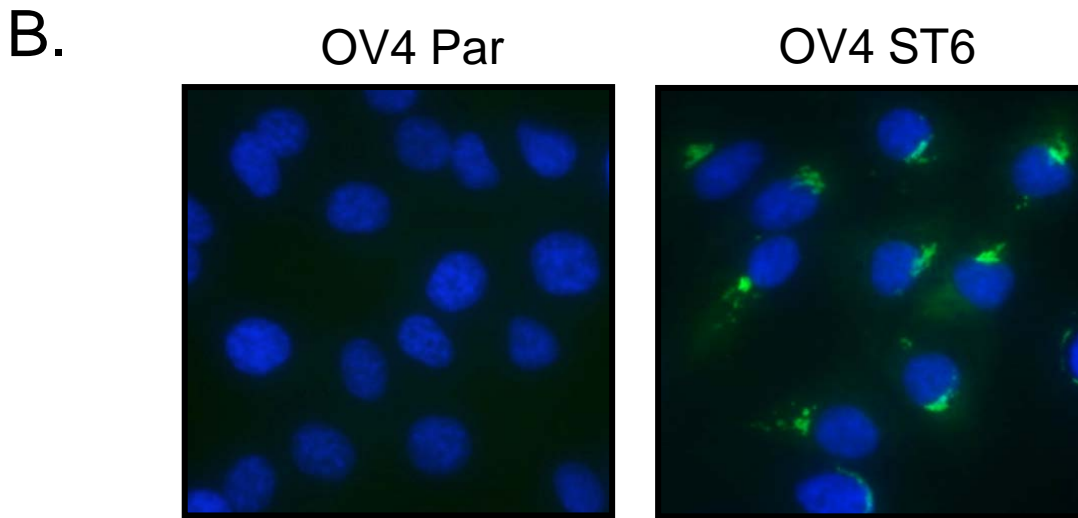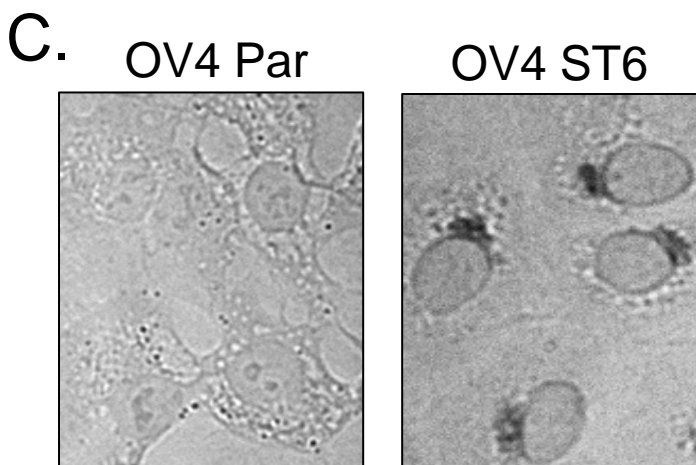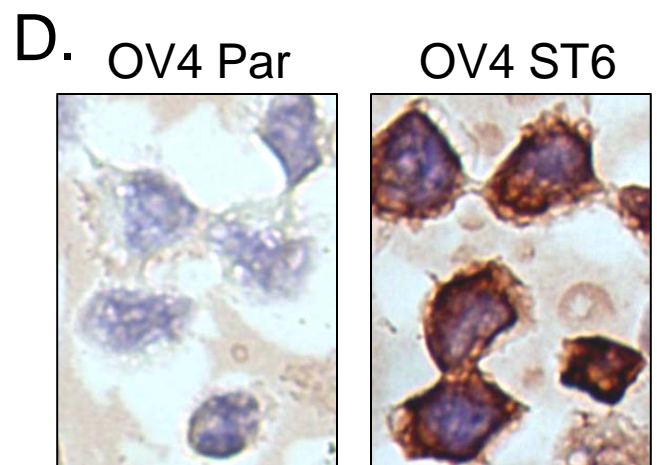

Supplement: NIHMS582335-supplement-2.pdf [file NIHMS582335-supplement-2.pdf]
